# Supplementary material for: Uncertainty in Offshore Wind Power Forecasts: A Regional Climate Modeling Approach for the North Sea
Source: Copernicus journal article supplement (doi:10.5194/wes-2025-64), 2025-05-12
Supplement: Supplementary file 1 [file wes-2025-64-supplement.pdf]

# Supplement—Uncertainty in Offshore Wind Power Forecasts: A Regional Climate Modeling Approach for the North Sea

Alberto Elizalde<sup>1</sup>, Naveed Akhtar<sup>1</sup>, Beate Geyer<sup>1</sup>, and Corinna Schrum<sup>1,2</sup>

<sup>1</sup>Institute of Coastal Systems - Analysis and Modeling, Helmholtz-Zentrum Hereon, Geesthacht, Germany

<sup>2</sup>Center for Earth System Research and Sustainability, Institute of Oceanography, University of Hamburg, Germany

**Correspondence:** Alberto Elizalde (alberto.elizalde@hereon.de)

## Supplement

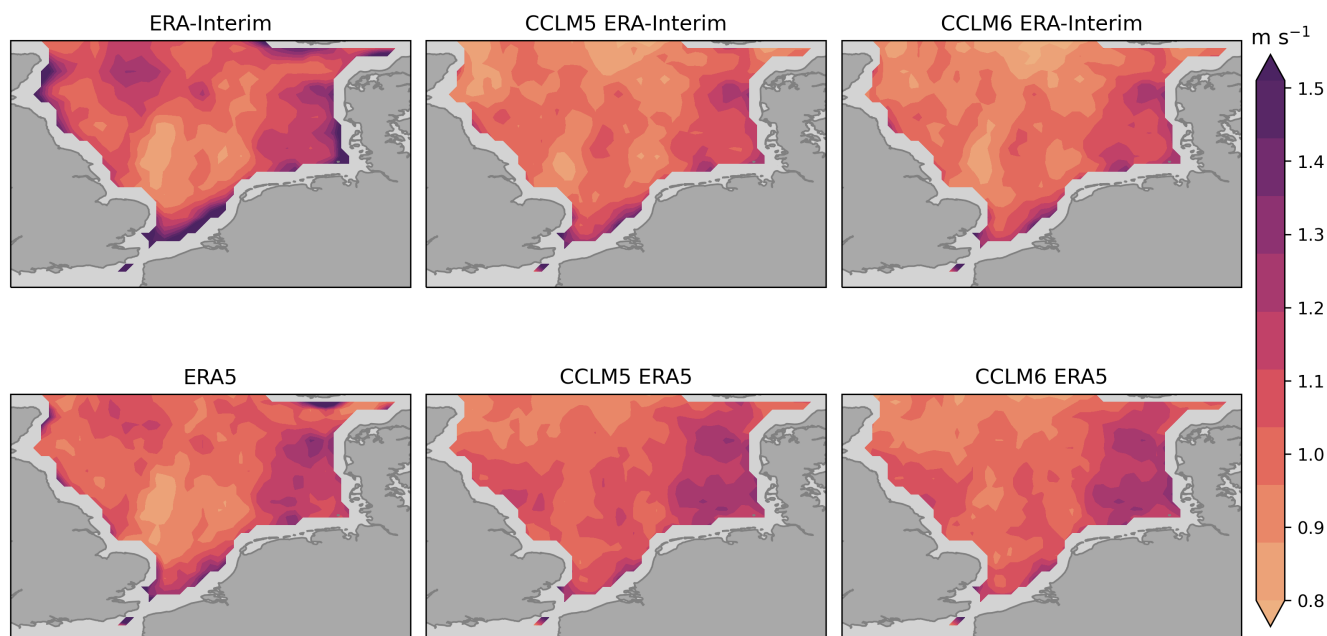

**Figure S1.** 10 meter wind speed root mean square error with respect to ASCAT in the period from 2013 to 2018 based on monthly values.
